# Supplementary material for: Tuneable dynamics of a scandium nitride cluster inside an Ih-C80 cage
Source: Royal Society of Chemistry journal article supplement (doi:10.1039/c4dt02892a), 2014-12-17
Supplement: c4dt02892a1.pdf [file c4dt02892a1.pdf]

## Supporting Information

### Tuneable Dynamics of Scandium Nitride Cluster Inside an $I_h$ -C<sub>80</sub> Cage

Yongqiang Feng,<sup>a</sup> Taishan Wang,<sup>\*a</sup> Junfeng Xiang,<sup>a</sup> Lihua Gan,<sup>b</sup> Bo Wu,<sup>a</sup> Li Jiang,<sup>a</sup> and Chunru Wang<sup>\*a</sup>

#### Contents

**Figure S1.** HPLC profile of the Sc<sub>3</sub>N@I<sub>h</sub>-C<sub>80</sub> fulleropyrrolidine product mixture from the reaction. (HPLC condition: 20×250 mm Buckyrep-M column; flow rate 12 mL/min; toluene as eluent).

**Figure S2.** HPLC profile and MALDI-TOF mass spectra of the purified Sc<sub>3</sub>N@I<sub>h</sub>-C<sub>80</sub> fulleropyrrolidine product (HPLC condition: 20×250 mm Buckyrep column; flow rate 12 mL/min; toluene as eluent).

**Figure S3.** HPLC profile of the Sc<sub>3</sub>N@I<sub>h</sub>-C<sub>80</sub>-PCBM product mixture from the reaction. (HPLC condition: 20×250 mm Buckyrep-M column; flow rate 12 mL/min; toluene as eluent).

**Figure S4.** HPLC profile and MALDI-TOF mass spectra of the purified Sc<sub>3</sub>N@I<sub>h</sub>-C<sub>80</sub>-PCBM product (HPLC condition: 20×250 mm Buckyrep column; flow rate 12 mL/min; toluene as eluent).

**Figure S5.** HPLC profile of the purified Sc<sub>3-x</sub>Y<sub>x</sub>N@I<sub>h</sub>-C<sub>80</sub> (x = 0-3). (HPLC condition: 20×250 mm Buckyrep column; flow rate 12 mL/min; toluene as eluent).

**Figure S6.** MALDI-TOF mass spectra of the purified Sc<sub>3-x</sub>Y<sub>x</sub>N@I<sub>h</sub>-C<sub>80</sub> (x = 0-3).

**Figure S7.** (a) <sup>13</sup>C NMR (150 MHz) and (b) <sup>45</sup>Sc NMR (145 MHz) spectra of Sc<sub>3</sub>N@I<sub>h</sub>-C<sub>80</sub> in d<sub>4</sub>-ODCB.

### 1. Synthesis and purification of $\text{Sc}_3\text{N}@I_h\text{-C}_{80}$ fulleropyrrolidine

Prato reaction adduct of  $\text{Sc}_3\text{N}@C_{80}$  was performed by mixing a solution of  $\text{Sc}_3\text{N}@C_{80}$  with an excess of *N*-ethylglycine and paraformaldehyde in *o*-dichlorobenzene (ODCB) and stirred at 120 °C for 30 min. The product was isolated and purified by HPLC.

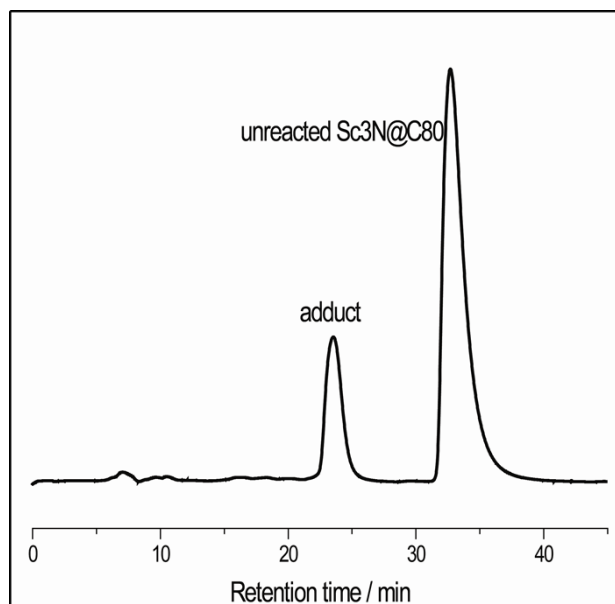

**Figure S1.** HPLC profile of the  $\text{Sc}_3\text{N}@I_h\text{-C}_{80}$  fulleropyrrolidine product mixture from the reaction. (HPLC condition: 20×250 mm Buckyprep-M column; flow rate 12 mL/min; toluene as eluent).

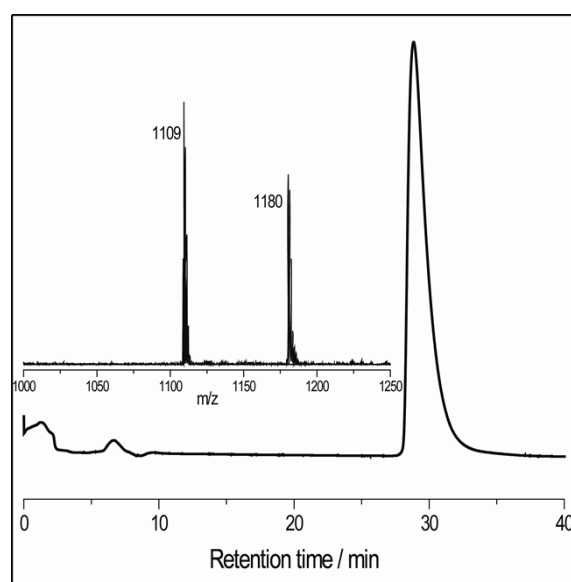

**Figure S2.** HPLC profile and MALDI-TOF mass spectra of the purified  $\text{Sc}_3\text{N}@I_h\text{-C}_{80}$  fulleropyrrolidine product (HPLC condition: 20×250 mm Buckyprep column; flow rate 12 mL/min; toluene as eluent).

## 2. Synthesis and purification of Sc<sub>3</sub>N@C<sub>80</sub>-PCBM

Sc<sub>3</sub>N@C<sub>80</sub>-PCBM (PCBM = phenyl-C<sub>81</sub>-butyric acid methyl ester) was synthesized as reported previously.<sup>1</sup> To be brief, 56.1 mg of methyl 4-benzoylbutyrate p-tosylhydrazone was dissolved in 6 mL of pyridine in a dried three-necked flask provided with an Ar inlet and a magnetic stirring bar. Then, 8.4 mg of NaOMe was added, and the mixture was stirred for 15 min. A solution of 16.5 mg of Sc<sub>3</sub>N@C<sub>80</sub> in 18 mL of HPLC grade 1,2-dichlorobenzene was added, and the homogeneous reaction solution was stirred at 70 °C for 24 h. The target Sc<sub>3</sub>N@C<sub>80</sub>-PCBM was isolated from the reaction mixture by HPLC.

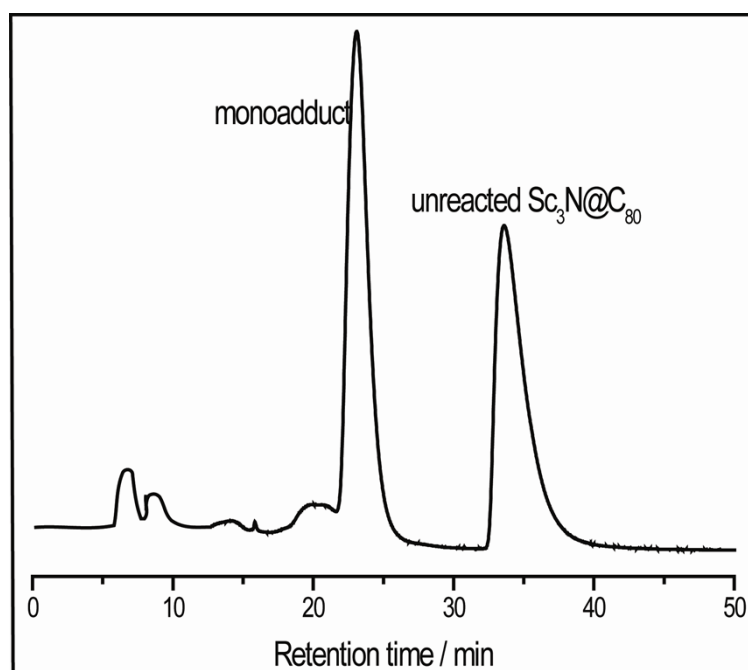

**Figure S3.** HPLC profile of the Sc<sub>3</sub>N@I<sub>n</sub>-C<sub>80</sub>-PCBM product mixture from the reaction. (HPLC condition: 20×250 mm Buckyprep-M column; flow rate 12 mL/min; toluene as eluent).

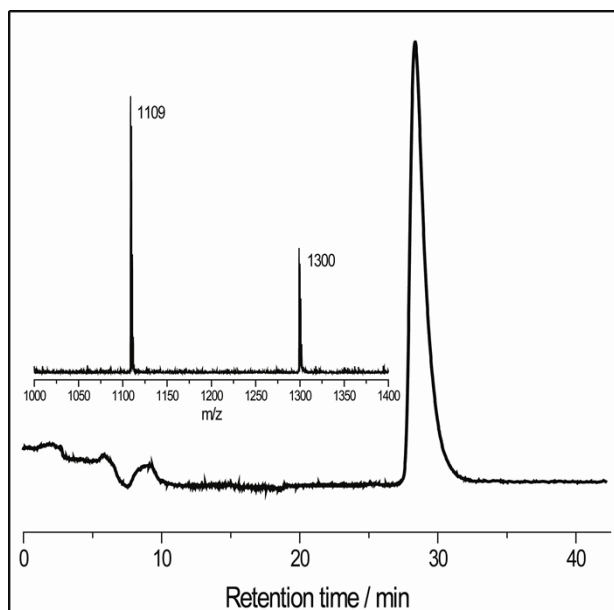

**Figure S4.** HPLC profile and MALDI-TOF mass spectra of the purified  $\text{Sc}_3\text{N}@I_h\text{-C}_{80}\text{-PCBM}$  product (HPLC condition:  $20\times 250$  mm Buckyprep column; flow rate 12 mL/min; toluene as eluent).

### 3. The synthesis and purification of $\text{Sc}_{3-x}\text{Y}_x\text{N}@I_h\text{-C}_{80}$ ( $x = 0-3$ )

The scandium nitride clusterfullerenes  $\text{Sc}_{3-x}\text{Y}_x\text{N}@I_h\text{-C}_{80}$  ( $x = 0-3$ ) were synthesized by the Krätschmer-Huffman arc discharge method and isolated by the multistage high-performance liquid chromatography (HPLC) strategy.<sup>2</sup> Briefly, the mixture of Sc/Ni alloy, Y/Ni alloy and graphite powder with a mass ratio of 3: 3: 1 was packed into the core-drilled graphite rods, subsequently the rods were burnt at 120 A direct current under a total of 200 Torr atmosphere (97.5% He/2.5%  $\text{N}_2$ ). The as-prepared soot was Soxhlet-extracted by toluene for 20 h, and the target molecules were isolated and purified by two complementary HPLC columns, that is, Buckyprep and Buckyprep-M. The high purity of each  $\text{Sc}_{3-x}\text{Y}_x\text{N}@I_h\text{-C}_{80}$  ( $x = 0-3$ ) sample was confirmed by a single-peak HPLC profile and a single-peak MALDI-TOF profile of corresponding counterpart

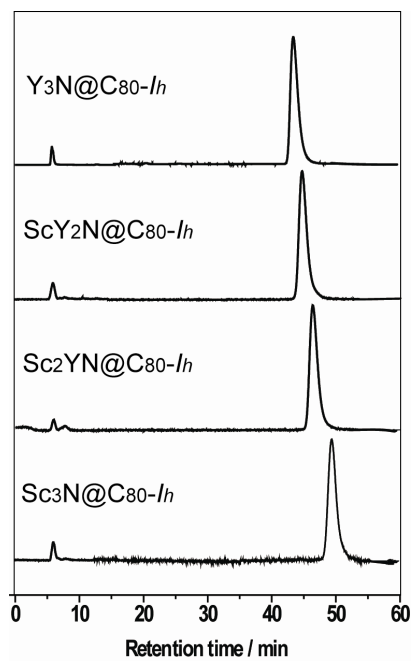

**Figure S5.** HPLC profile of the purified  $\text{Sc}_{3-x}\text{Y}_x\text{N}@I_h\text{-C}_{80}$  ( $x = 0-3$ ). (HPLC condition:  $20 \times 250$  mm Buckyprep column; flow rate 12 mL/min; toluene as eluent).

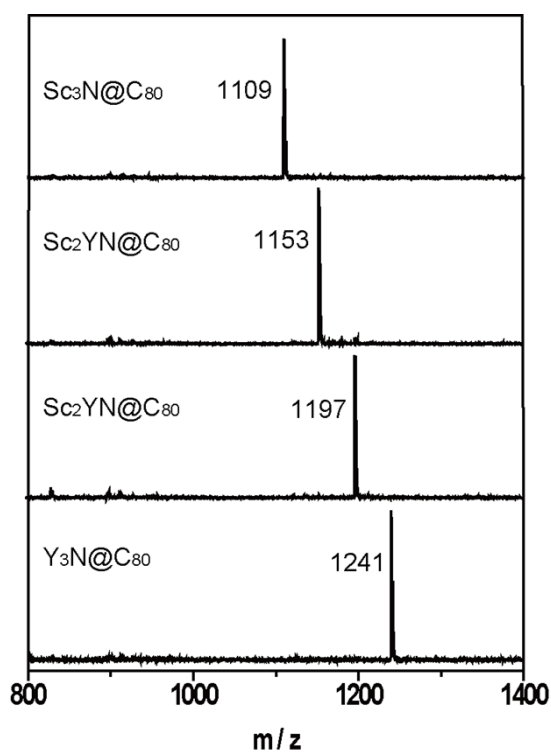

**Figure S6.** MALDI-TOF mass spectra of the purified  $\text{Sc}_{3-x}\text{Y}_x\text{N}@I_h\text{-C}_{80}$  ( $x = 0-3$ ).

#### 4. $^{13}\text{C}$ NMR and $^{45}\text{Sc}$ NMR experiment

$^{13}\text{C}$  NMR and  $^{45}\text{Sc}$  NMR spectra were measured at 600 MHz on a Bruker AVANCE-600 spectrometer. For varied-temperature  $^{45}\text{Sc}$  NMR measurement,  $\text{CS}_2$  acted as the solvent and  $d_8$ -THF as internal lock agent. For ambient-temperature  $^{13}\text{C}$  and  $^{45}\text{Sc}$  NMR measurement, *o*-dichlorobenzene- $d_4$  was chosen as solvent and internal lock agent.

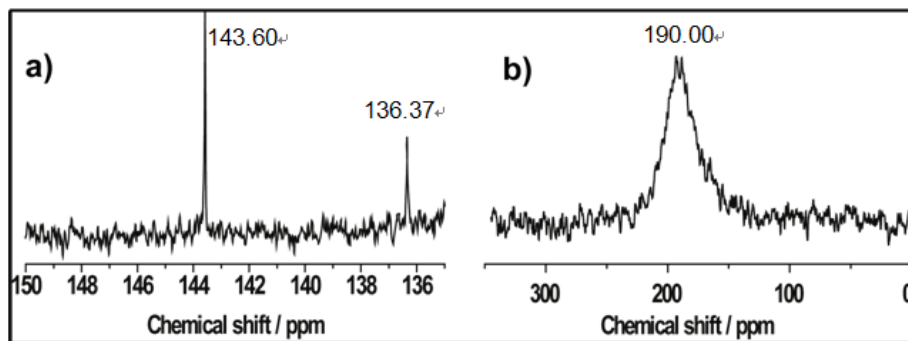

**Figure S7.** (a)  $^{13}\text{C}$  NMR (150 MHz) and (b)  $^{45}\text{Sc}$  NMR (145 MHz) spectra of  $\text{Sc}_3\text{N}@I_h\text{-C}_{80}$  in  $d_4$ -ODCB.

#### 5. DFT calculations

All the density functional theory (DFT) computations were performed by the generalized gradient approximation (GGA) functional of Perdew, Burke, and Ernzerhof /double numerical plus polarization using the DMol<sup>3</sup> code in Accelrys Materials Studio.<sup>3,4</sup>

#### References

- 1 C. Shu, W. Xu, C. Slebodnick, H. Champion, W. Fu, J. E. Reid, H. Azurmendi, C. Wang, K. Harich, H. C. Dorn, *Org. Lett.* **2009**, *11*, 1753-1756
- 2 N. Chen, L.-Z. Fan, K. Tan, Y.-Q. Wu, C.-Y. Shu, X. Lu, C.-R. Wang, *J. Phys. Chem. C* **2007**, *111*, 11823-11828.
- 3 J. P. Perdew, K. Burke, M. Ernzerhof, *Phys. Rev. Lett.* **1996**, *77*, 3865-3868.
- 4 (a) B. Delley, *J. Chem. Phys.* **1990**, *92*, 508-517; (b) B. Delley, *J. Chem. Phys.* **2000**, *113*, 7756. DMol3 is available as part of Material Studio.
